# Supplementary material for: Characterization of humoral and SARS-CoV-2 specific T cell responses in people living with HIV
Source: PubMed Central journal article supplement (PMC8492866; doi:10.1038/s41467-021-26137-7), 2021-10-05
Supplement: 41467_2021_26137_MOESM1_ESM.pdf [file 41467_2021_26137_MOESM1_ESM.pdf]

## **Supplementary Information**

Characterization of humoral and SARS-CoV-2 specific T cell responses in people living with HIV

**Supplementary Fig.1:** Antigen binding screen and associations between humoral responses and cohort parameters

**Supplementary Fig.2:** Magnitude of T cell responses and associations with HIV parameters, age, gender and ethnicity

**Supplementary Fig.3:** Interrelations between T cell and antibody responses in HIV positive and negative male donors

**Supplementary Fig.4:** Cytokine profile of SARS-CoV-2-, CMV- and Gag- specific T cells

**Supplementary Fig.5:** Association between T cell immunophenotyping and SARS-CoV-2 adaptive immune responses

**Supplementary Fig.6:** Frequencies of CXCR3 cTfh cells and associations with neutralization titers in HIV positive and negative donors

**Supplementary Fig.7:** Examples of gating strategies

**Supplementary Table 1:** Cohort demographics and clinical characteristics

**Supplementary Table 2:** Antibodies used for phenotypic analysis and virus-specific T cell characterization

**Supplementary Fig.1: Antigen binding screen and associations between humoral responses and cohort parameters.** **a** Antigen binding screen in pre-pandemic samples from n=16 HIV positive donors and **b** the whole cohort with convalescent COVID-19 disease (n=82). Dotted lines indicate negative, low positive and positive threshold for absorbance [450nm]. **c** Correlation between age and S1 IgG titer according to gender in HIV negative donors and HIV positive subjects. **d** Correlation between age and ID50 according to gender in HIV negative donors and HIV positive subjects and **e** between DPSO and ID50 in the two study groups. **f** S1 IgG titer and ID50 levels summary dot plots according to ethnicity in HIV positive (n=30) and negative donors (n=29). Line on the plot represents the Geometric Mean. **g** S1 IgG, N titers and ID50 according to gender in HIV positive (n=29) and HIV (n=29) negative donors. S1 IgG HIV-Female vs HIV+ Female p=0.0110; HIV- Male vs HIV+ Female p=0.02; HIV+ Male vs HIV+ Female p=0.004). Plots show the Geometric Mean. Significance determined by two-tailed Mann-Whitney test. The non-parametric Spearman test was used for correlation analysis. \*p < 0.05, \*\*p<0.01.

# Supplementary Figure 1

**a** Antigen binding screen pre-2020 samples

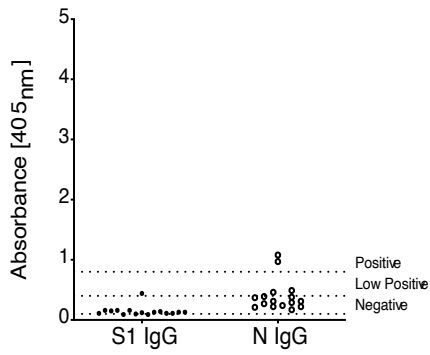

**b** Antigen binding screen 2020 samples

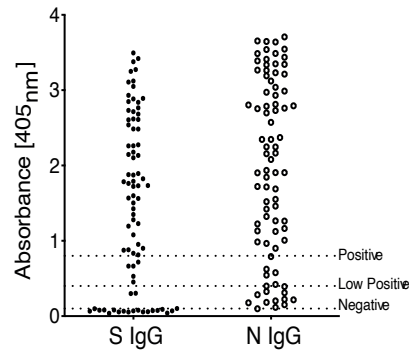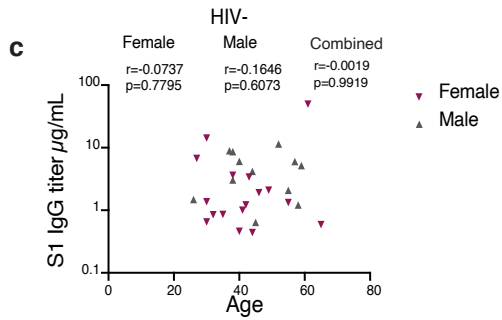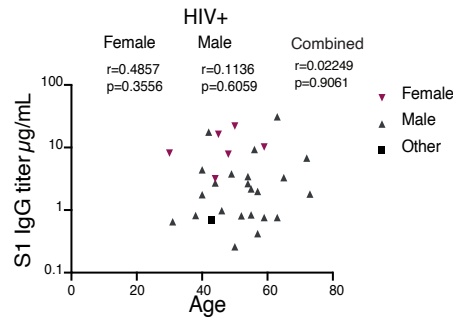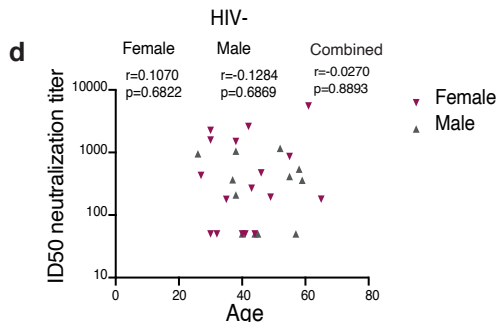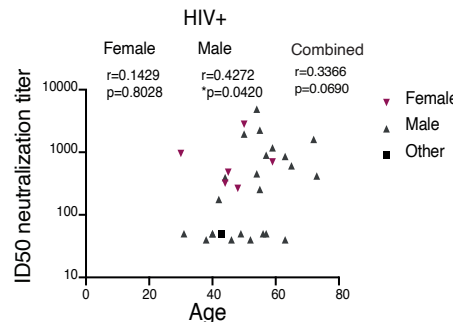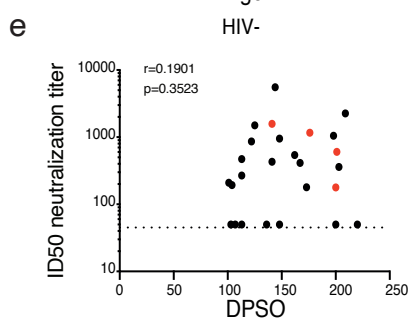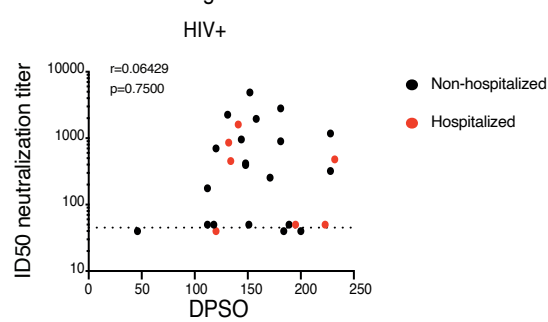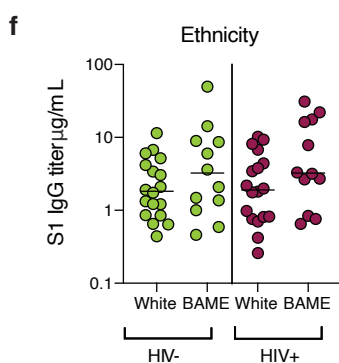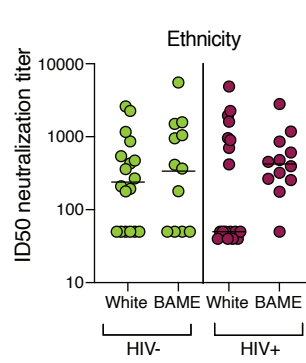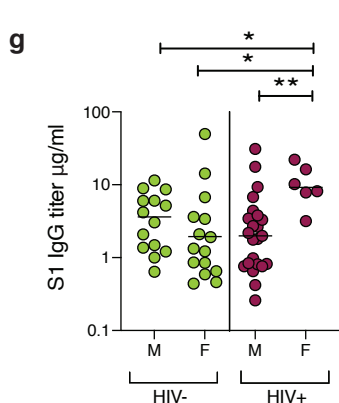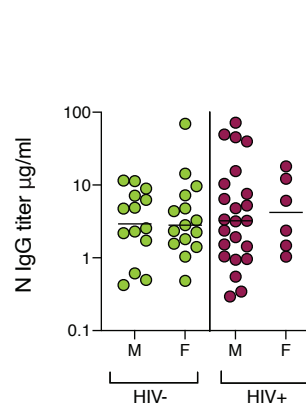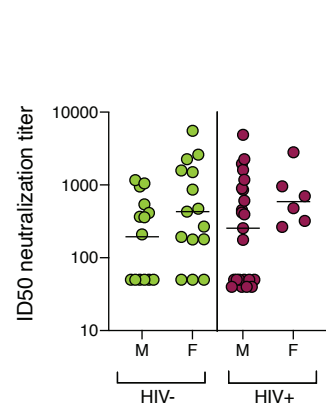

**Supplementary Fig.2: Magnitude of T cell responses and associations with HIV parameters, age, gender and ethnicity.** **a** Percentage of responders to each peptide pool **b** Magnitude of the IFN- $\gamma$ -ELISpot responses. IFN- $\gamma$  SFU/10<sup>6</sup> PBMCs are shown for SARS-CoV-2 ORF3a, ORF6, ORF7, ORF8 and Env between HIV negative (green) and HIV positive (red). (n=30 per group). Plots show the Geometric Mean. **c** Magnitude of the total SARS-CoV-2 responses analyzed in pre-pandemic samples, confirmed SARS-CoV-2 and suspected cases with clinical definition but found to be SARS-CoV-2 seronegative on screening. In suspected cases, orange dots depict HIV negative and brown dots HIV positive donors. Error bars represent Mean  $\pm$ SD (pre-pandemic vs HIV-COVID p=0.0192, pre-pandemic vs HIV+COVID p= 0.0278, COVID suspected vs HIV-COVID p= 0.0021, COVID suspected vs HIV+COVID p= 0.0036). Correlation between CD4:CD8 ratio in HIV infected individuals with their **d** Nucleoprotein and **e** Membrane responses, depicting disease severity per donor. Correlation of total SARS-CoV-2 responses with age in **f** HIV negative (n=30) and **g** HIV positive (n=30), depicting disease severity per donor. **h** Correlation of total SARS-CoV-2 responses with DPSO in HIV negative and **i** HIV positive, depicting disease severity per donor. **j** Magnitude of the total SARS-CoV-2 responses by ethnicity (n=30 in each group) and **k** gender between HIV negative (n=30 in total) and HIV positive (n=29 in total) donors. **l** Spike, M and N-specific T cell responses and **m** diversity of the IFN- $\gamma$ -ELISpot responses between HIV negative (n=30) and positive donors (n=30) according to gender. Geometric Mean is shown on the plots. The non-parametric Spearman test was used for correlation analysis (two-tailed). Two-way ANOVA was used for group comparisons. \*p < 0.05, \*\*p<0.01.

# Supplementary Figure 2

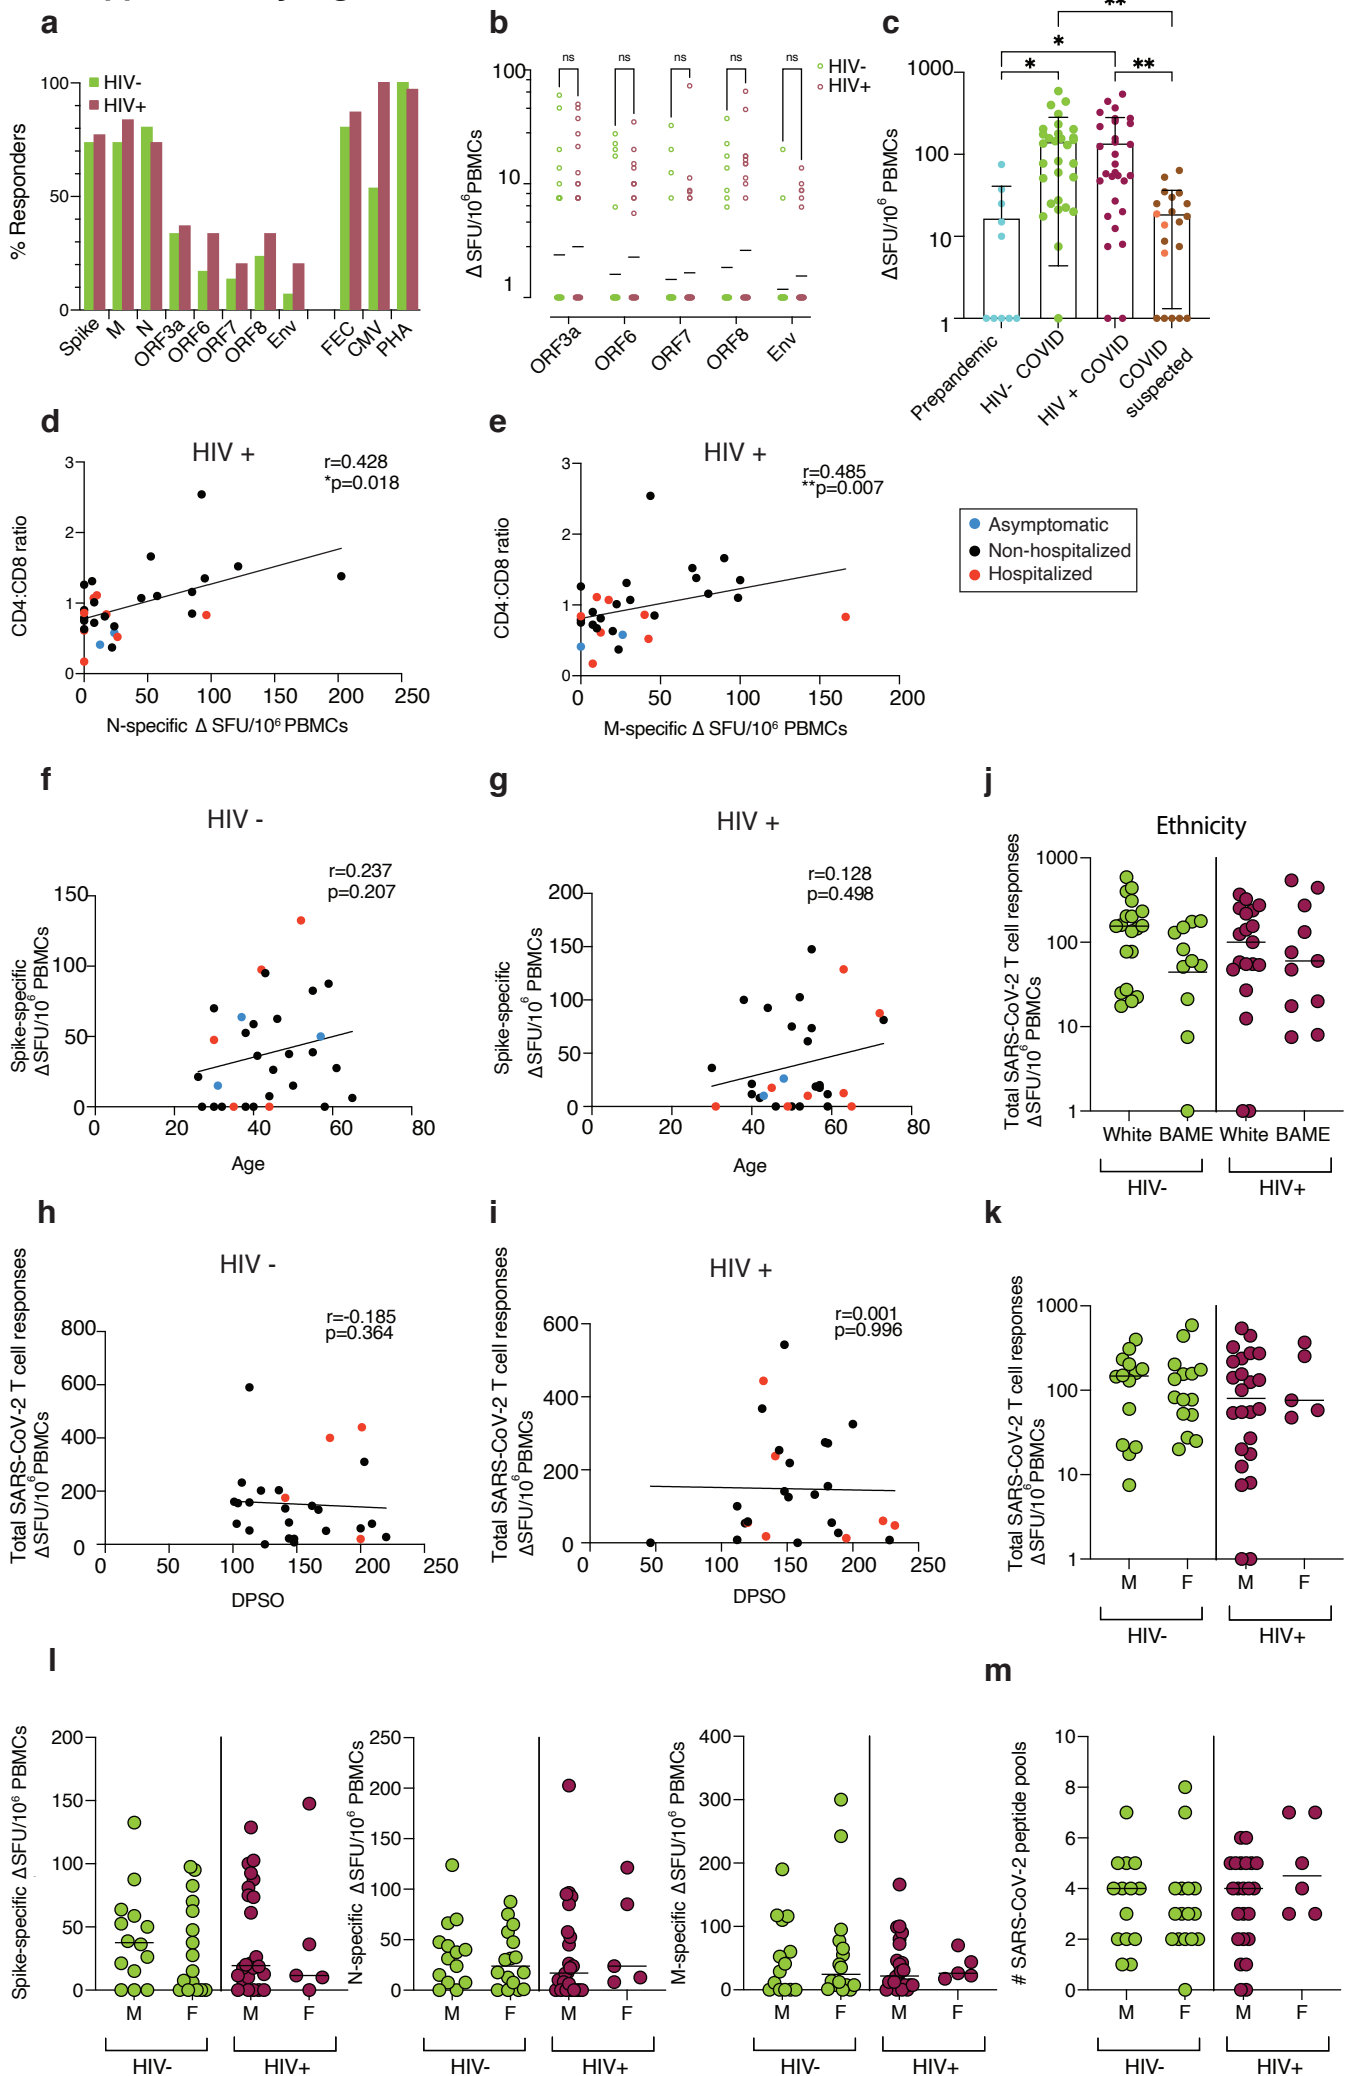

**Supplementary Fig.3: Interrelations between T cell and antibody responses in HIV positive and negative male donors.** **a** Correlation of total SARS-CoV-2 responses with S1 IgG titers in HIV negative and **b** HIV positive males. **c** Correlation of total SARS-CoV-2 responses with N IgG titers in HIV negative and **d** HIV positive males. **e** Correlation of neutralization titers with Spike-specific SARS-CoV-2 responses in HIV negative and **f** HIV positive males. **g** Correlation of neutralization titers with total SARS-CoV-2 responses in HIV negative and **h** HIV positive males. Red dots: hospitalized cases; black dots: non-hospitalized cases. The non-parametric Spearman test was used for correlation analysis. Two-tailed \* $p < 0.05$ .

### Supplementary Figure 3

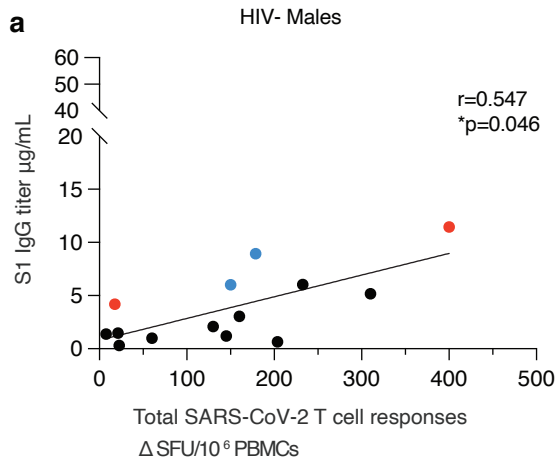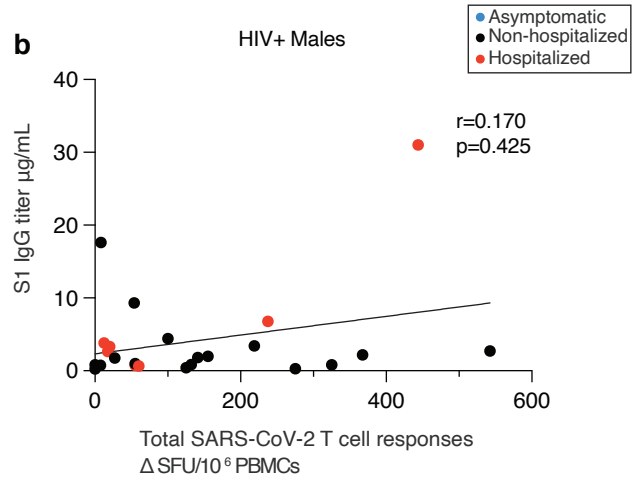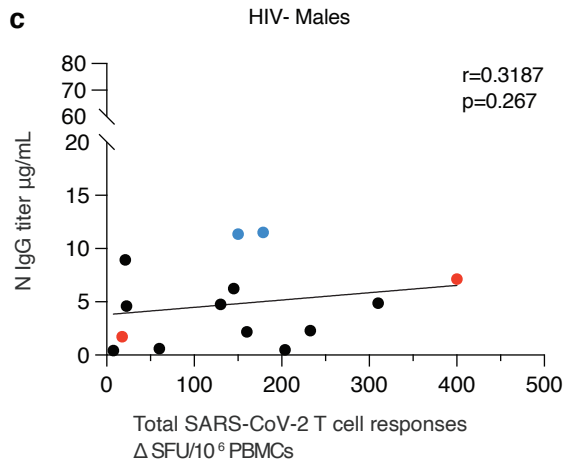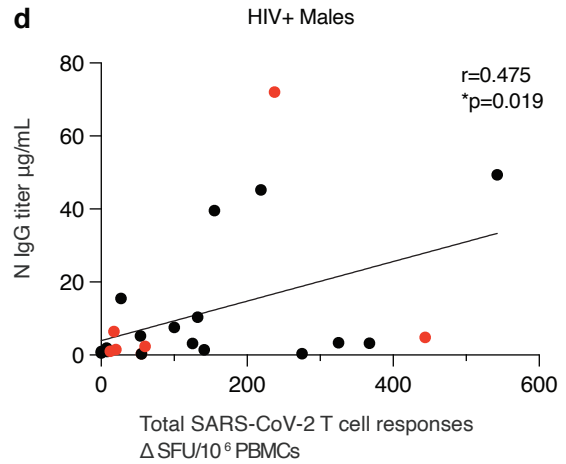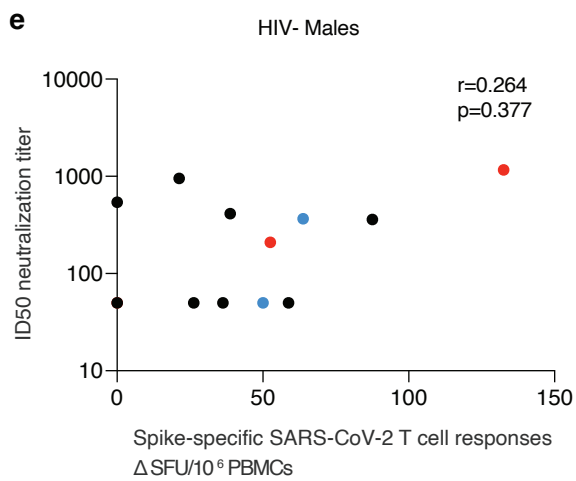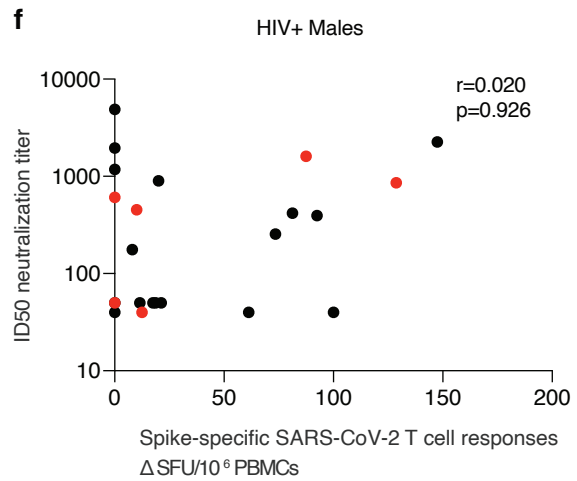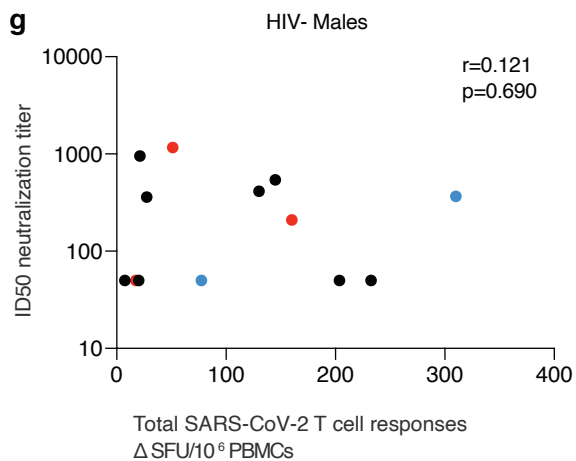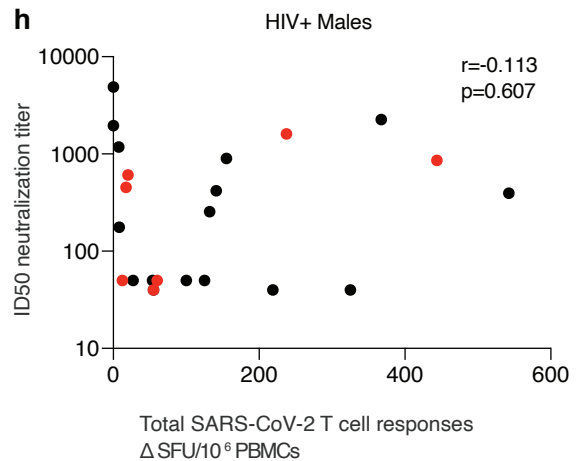

**Supplementary Fig.4: Cytokine profile of SARS-CoV-2-, CMV- and Gag- specific T cells.**

**a** Frequency of SARS-CoV-2-specific CD154<sup>+</sup> CD4 T cells identified by expression of IFN- $\gamma$ <sup>+</sup>, IL-2<sup>+</sup>, or TNF- $\alpha$ <sup>+</sup> or overall responses with at least one of the three cytokines (IFN- $\gamma$ , TNF- $\alpha$  and IL-2) against Spike (S1 and S2 pools) **b** M/N or **c** combined (Spike and M/N) responses in HIV-negative (HIV-, n=12) and HIV positive individuals (HIV+, n=11) recovering from COVID-19 disease. **d** Representative flow plots and summary data **e** showing frequencies of overall (CD154<sup>+</sup>IFN- $\gamma$ <sup>+</sup>, CD154<sup>+</sup>IL-2<sup>+</sup>, or CD154<sup>+</sup>TNF- $\alpha$ <sup>+</sup>) SARS-CoV-2-, CMV-, or Gag-specific CD4 T cell responses in n=12 HIV- and n=11 HIV+ donors (HIV- SARS-CoV-2 vs CMV p=0.0468, HIV+ SARS-CoV-2 vs CMV p=0.0137, HIV+ SARS-CoV-2 vs Gag p=0.001, HIV+ CMV vs Gag p=0.0225). **f** Frequency of SARS-CoV-2-specific CD8 T cells identified by expression of IFN- $\gamma$ <sup>+</sup>, IL-2<sup>+</sup> or TNF- $\alpha$ <sup>+</sup>, or overall responses with at least one of the three cytokines (IFN- $\gamma$ , TNF- $\alpha$  and IL-2) against Spike (S1 and S2 pools) **g** M/N or **h** combined (Spike and M/N) responses in HIV-negative (HIV-, n=12) and HIV-positive individuals (HIV+, n=11). (Non-spike-specific IL-2<sup>+</sup> CD8 T cells, p= 0.0295; Total SARS-CoV-2 specific IL-2<sup>+</sup> CD8 T cells, p= 0.0335). **i** Representative flow plots and **j** summary data showing frequencies of overall (IFN- $\gamma$ <sup>+</sup>, IL-2<sup>+</sup>, or TNF- $\alpha$ <sup>+</sup>) SARS-CoV-2-, CMV-, or Gag-specific CD8 T cell responses in the HIV- (n=12) and HIV+ (n=11) group. (HIV- SARS-CoV-2 vs CMV p=0.0312, HIV+ SARS-CoV-2 vs CMV p=0.001, HIV+ SARS-CoV-2 vs Gag p=0.001, HIV+ CMV vs Gag p=0.009). Error bars represent SEM. The non-parametric Spearman test was used for correlation analysis; p values for individual correlation analysis within groups, HIV- (green) or HIV+ (red) or combined correlation analysis (black) are presented. Significance determined by Mann-Whitney *U* test or Wilcoxon matched- pairs signed rank test, Two-tailed \*p<0.05, \*\*p<0.01, \*\*\*p < 0.001.



# Supplemental Figure 4

## a SARS-CoV-2 specific CD4 T cells

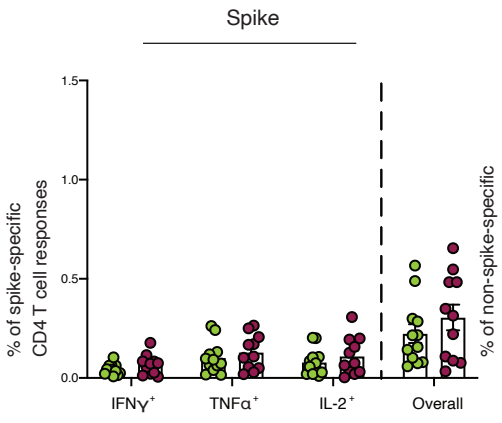

## b Non-spike (M/N)

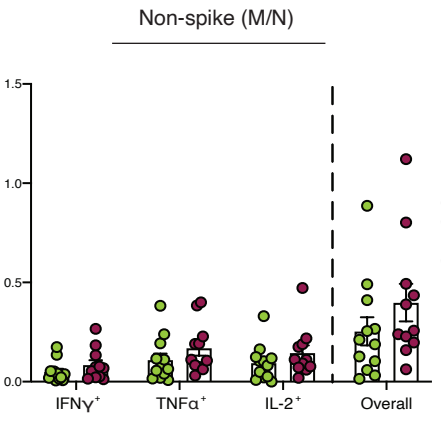

## c Total

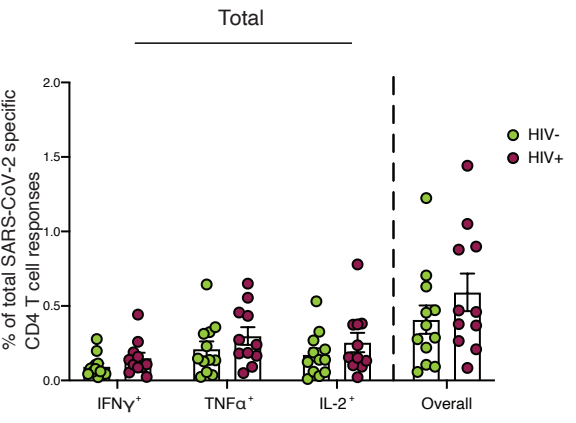

## d SARS-CoV-2 specific CD4 T cells

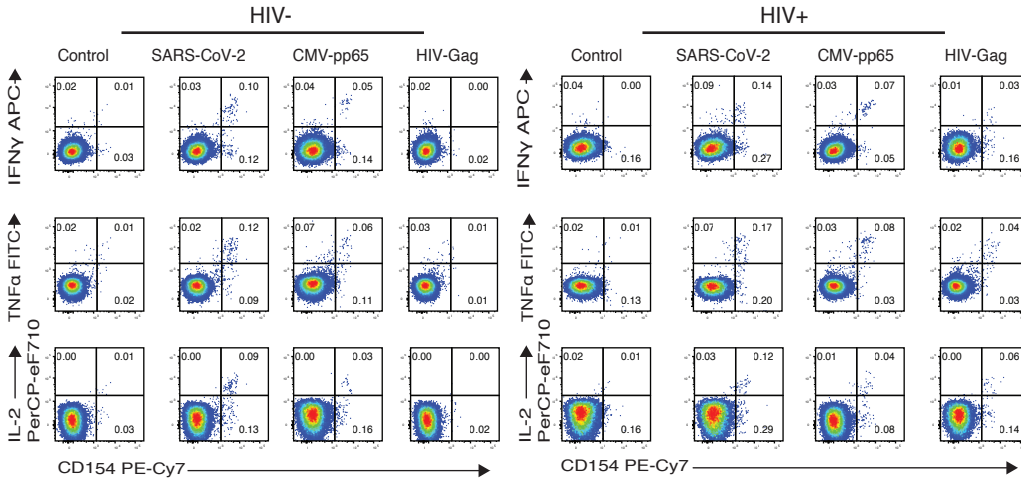

## e

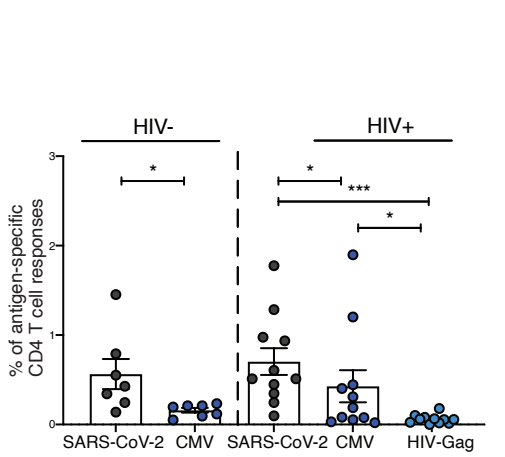

## f SARS-CoV-2 specific CD8 T cells

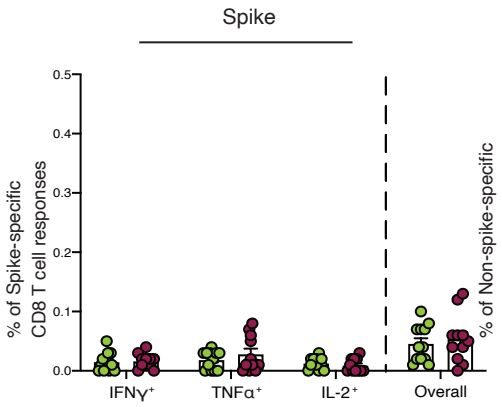

## g

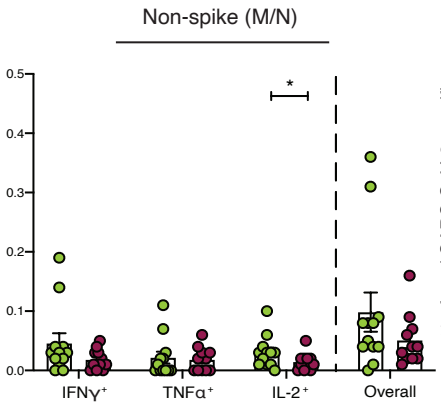

## h

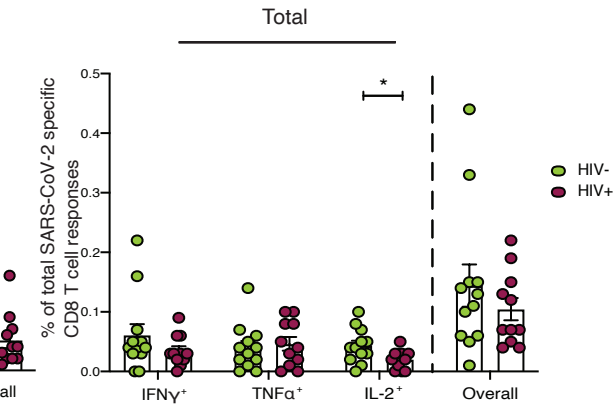

## i SARS-CoV-2 specific CD8 T cells

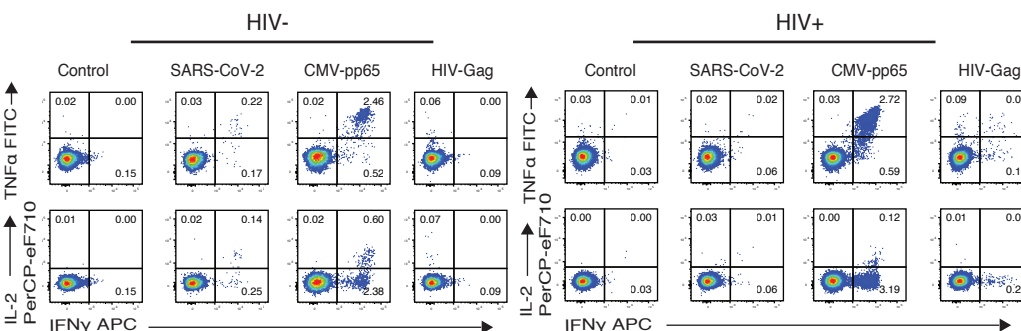

## j

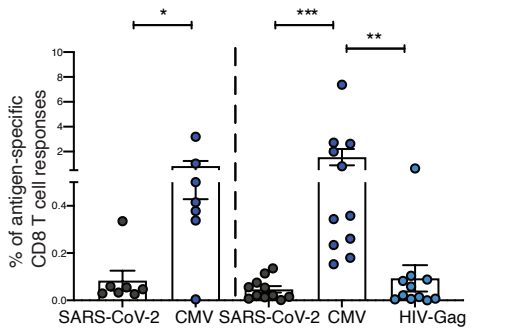

**Supplementary Fig.5: Association between T cell immunophenotyping and SARS-CoV-2 adaptive immune responses.** **a** Representative flow plots and **b** summary data of the frequency of CD38<sup>+</sup> HLADR<sup>+</sup> CD4 (p=0.0034) and CD8 (p=0.0252) T cells, and correlations between percentage of CD38<sup>+</sup> HLADR<sup>+</sup> CD4 and CD8 T cells and total SARS-CoV-2-specific T cell responses in HIV-seronegative (HIV-, n=26) and HIV positive individuals (HIV+, n=19). Plots show the Geometric Mean. **c** Representative flow plots and **d** summary data of frequency of PD-1<sup>+</sup> TIGIT<sup>+</sup> CD4 (p=0.0003) and CD8 (p=0.0238) T cells, and correlations between percentage of PD-1<sup>+</sup> TIGIT<sup>+</sup> CD4 and CD8 T cells and total SARS-CoV-2-specific T cell responses. Plots show the Geometric Mean. **e** Representative flow plots showing the gating strategy used to define total circulating and activated Tfh subsets in the study groups and summary data (CXCR5<sup>+</sup>PD-1<sup>+</sup>Tfh p=0.0025). Plots show the Geometric Mean. **f** Correlations between percentage of activated Tfh and S1 IgG or N IgG titers. Significance determined by two-tailed Mann-Whitney *U* test. The non-parametric Spearman test was used for correlation analysis; combined correlation analysis is depicted. \*p<0.05, \*\*p<0.01, \*\*\*p < 0.001.

# Supplementary Figure 5

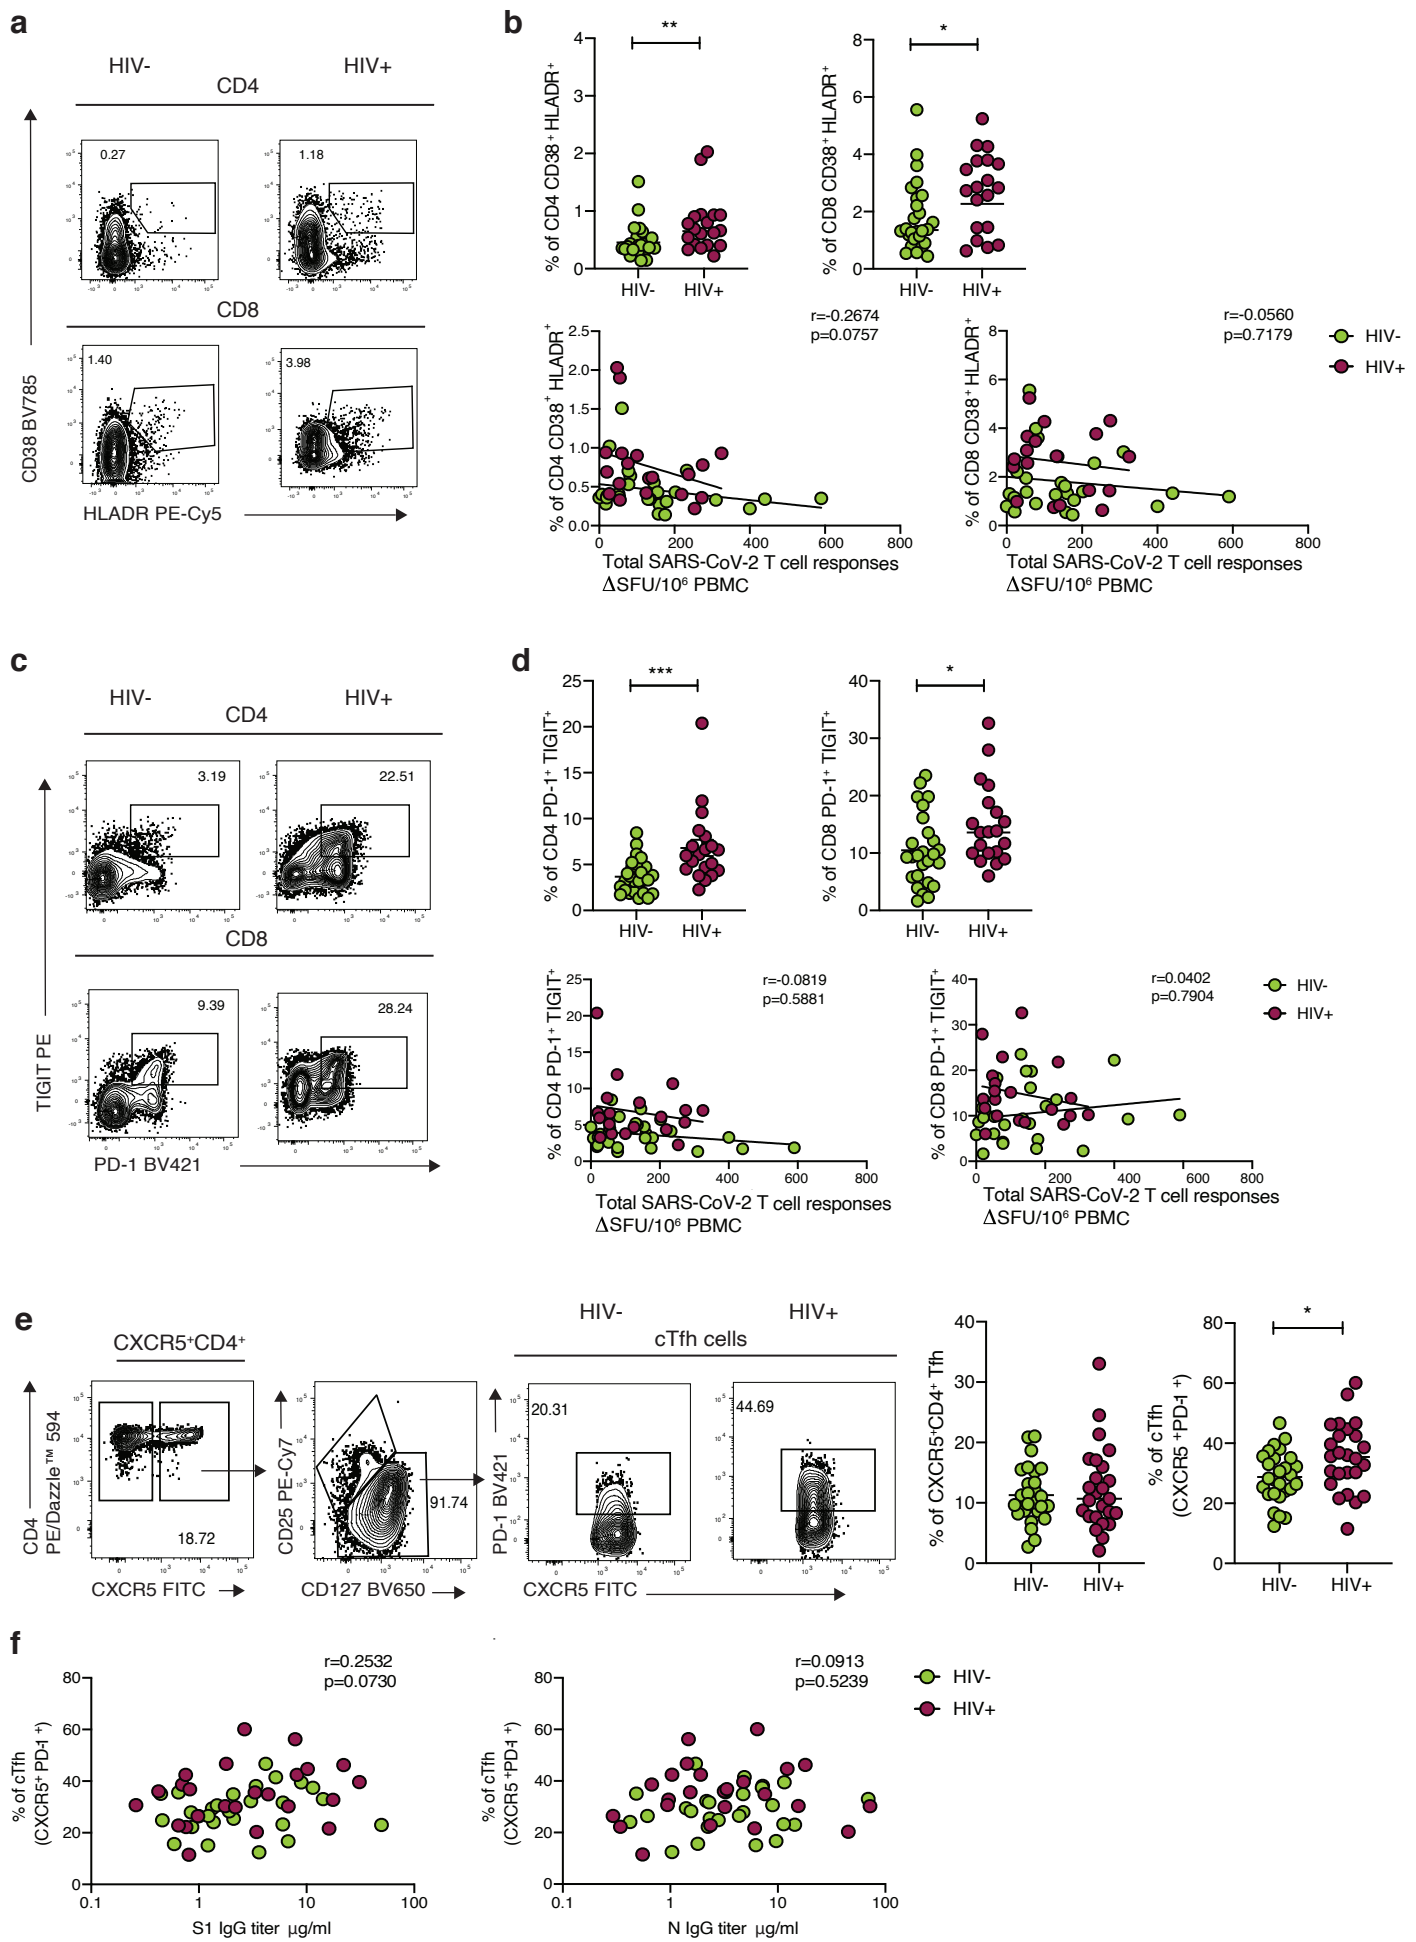

**Supplementary Fig.6: Frequencies of CXCR3 cTfh cells and associations with neutralization titers in HIV positive and negative donors.** **a** Representative flow plots of the gating strategy for the identification of CXCR3<sup>+</sup> and CXCR3<sup>-</sup> cTfh cells (PD-1<sup>+</sup>CD25<sup>low</sup>CD127<sup>high</sup>CXCR5<sup>+</sup>CD4<sup>+</sup>). **b** Summary data of the proportions of CXCR3<sup>+</sup> and CXCR3<sup>-</sup> out of total cTfh cells in SARS-CoV-2 in convalescent HIV negative (n=27) and HIV positive (n=25) individuals. (CXCR3<sup>+</sup> p=0.0201, CXCR3<sup>-</sup> p=0.0182) **c** frequency of CXCR3<sup>+</sup> and CXCR3<sup>-</sup> cTfh cells between HIV negative (n=27) and positive (n=24) donors according to gender. (CXCR3<sup>+</sup>: HIV- Male vs Female p=0.0321, HIV- Female vs HIV+ Male p=0.0027; CXCR3<sup>-</sup>: HIV- Male vs Female p=0.0321, HIV- Female vs HIV+ Male p=0.0021) **d** Correlation between ID50 and frequency of CXCR3<sup>+</sup> cTfh cells and **e** CXCR3<sup>-</sup> cTfh cells. **f** Correlation between ID50 and percentage of CXCR3<sup>+</sup> cTfh cells according to gender in HIV negative (n=27) and **g** HIV positive (n=23) donors. **h** Correlation between ID50 and percentage of CXCR3<sup>-</sup> cTfh cells according to gender in HIV negative (n=27) and **i** HIV positive (n=23) donors. Significance determined by two-tailed Mann-Whitney *U* test. The non-parametric Spearman test was used for correlation analysis. \*p<0.05, \*\*p<0.01.

# a Supplementary Figure 6

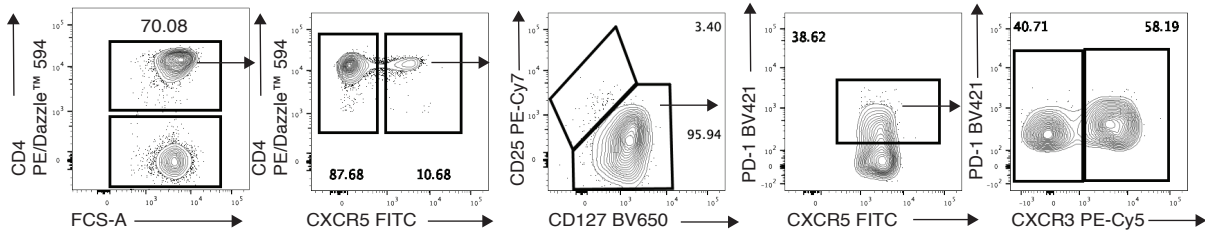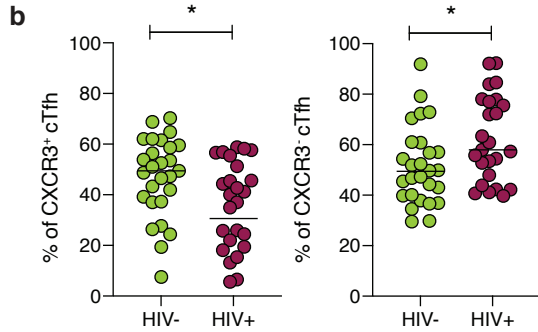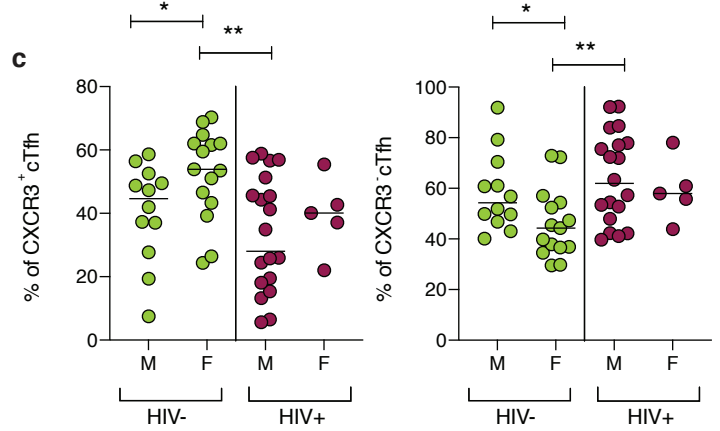

**d**

| HIV-         | HIV+         | Combined     |
|--------------|--------------|--------------|
| $r = 0.1636$ | $r = 0.1842$ | $r = 0.1797$ |
| $p = 0.4149$ | $p = 0.3888$ | $p = 0.2070$ |

**e**

| HIV-          | HIV+          | Combined      |
|---------------|---------------|---------------|
| $r = -0.1664$ | $r = -0.1681$ | $r = -0.1831$ |
| $p = 0.4069$  | $p = 0.4325$  | $p = 0.1984$  |

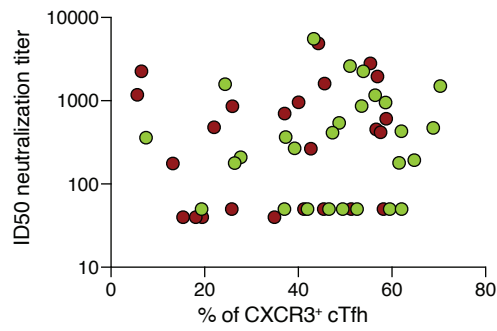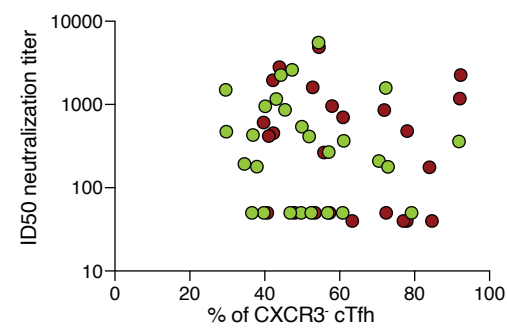

**f**

| HIV-          | Female       | Male |
|---------------|--------------|------|
| $r = -0.1505$ | $r = 0.4206$ |      |
| $p = 0.5917$  | $p = 0.1748$ |      |

**g**

| HIV+         | Female       | Male |
|--------------|--------------|------|
| $r = 0.4000$ | $r = 0.1960$ |      |
| $p = 0.5167$ | $p = 0.4356$ |      |

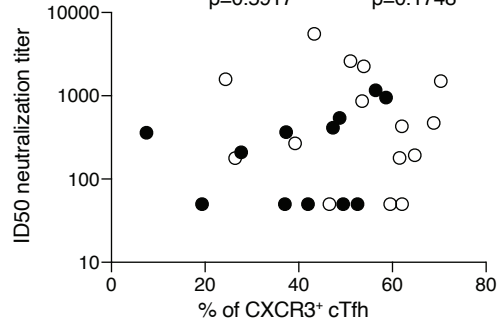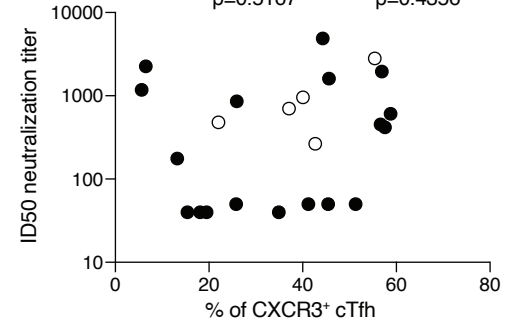

**h**

| HIV-         | Female        | Male |
|--------------|---------------|------|
| $r = 0.1219$ | $r = -0.3843$ |      |
| $p = 0.6655$ | $p = 0.2183$  |      |

**i**

| HIV+          | Female        | Male |
|---------------|---------------|------|
| $r = -0.4000$ | $r = -0.2033$ |      |
| $p = 0.5167$  | $p = 0.4183$  |      |

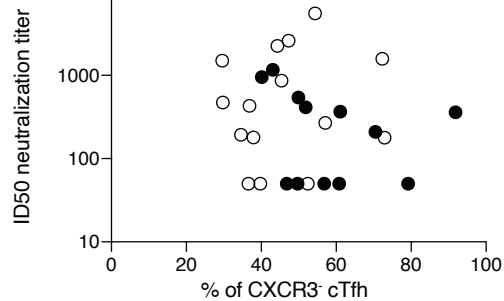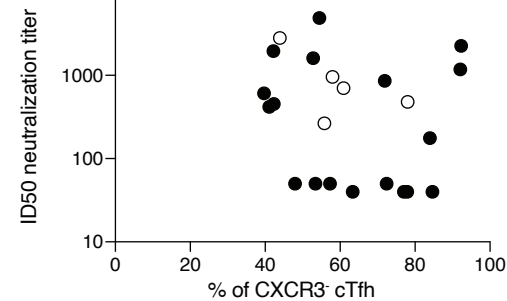

**Supplementary Fig.7: Examples of gating strategies.** **a** Cells were gated on single lymphocyte population by side and forward side scatter, followed by live cells gating by excluding dead, CD19 and CD14 cells. Following gating on live CD3<sup>+</sup> T cells, cells were gated on CD4 T cells (CD4<sup>+</sup>CD8<sup>-</sup>) or CD8 T cells (CD4<sup>-</sup>CD8<sup>+</sup>). Virus-specific CD4 and CD8 T cells were identified by expression of CD154, IFN- $\gamma$ , TNF and IL-2 as shown following peptide stimulation. This gating strategy was used for Fig. 4a, d, 5a, c, e and Supplementary Fig. 4d, i.

**b** Gating strategy used to identify the proportion of CD45RA<sup>-</sup>/CCR7<sup>+</sup> central memory (CM), CD45RA<sup>+</sup>/CCR7<sup>+</sup> naïve, CD45RA<sup>+</sup>/CCR7<sup>-</sup> terminally differentiated effector memory (TEMRA) and CD45RA<sup>-</sup>/CCR7<sup>-</sup> effector memory (EM) CD4 and CD8 T cell subsets. This gating strategy was used for Fig. 6b, c.

**c** Gating strategy used for T cell immunophenotyping. This gating strategy was used for Supplementary Fig. 5a, c.

**d** Gating strategy used for the identification of cTfh cells (PD-1<sup>+</sup>CD25<sup>low</sup>CD127<sup>high</sup>CXCR5<sup>+</sup>CD4<sup>+</sup>). This gating strategy was used for Supplementary Fig. 5e and Fig. 6a.

# a Supplementary Figure 7

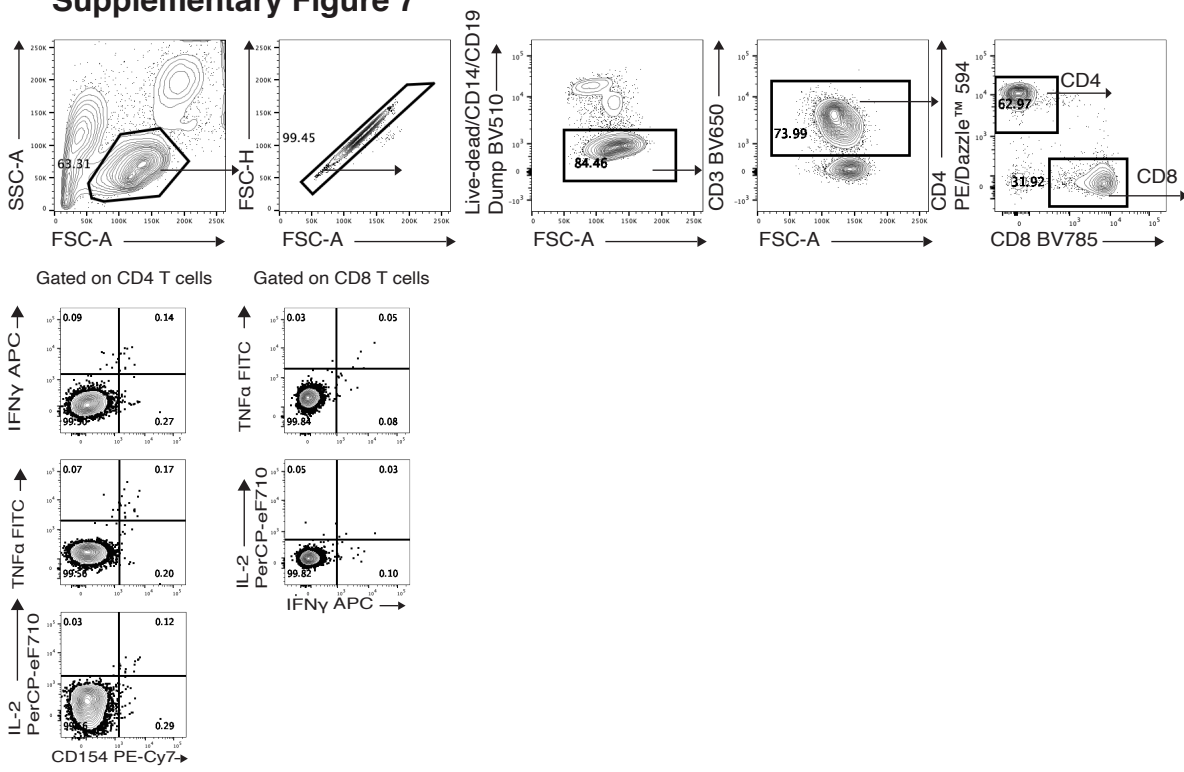

# b

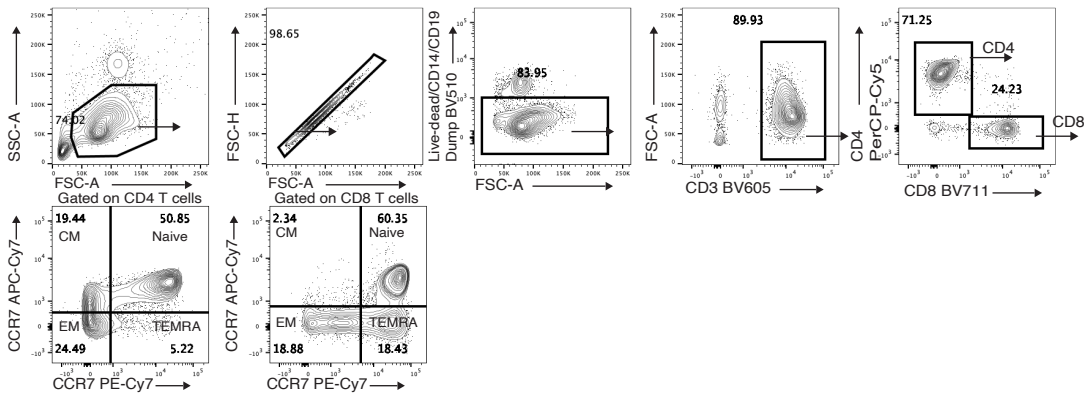

# c

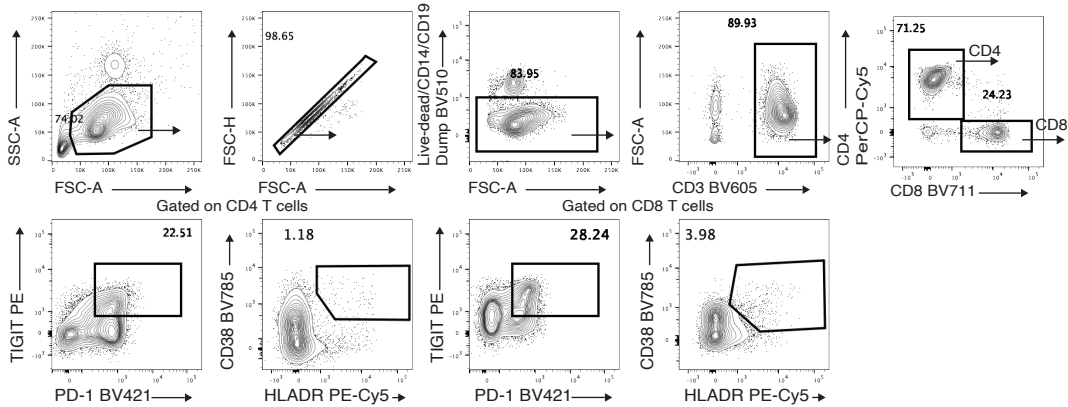

# d

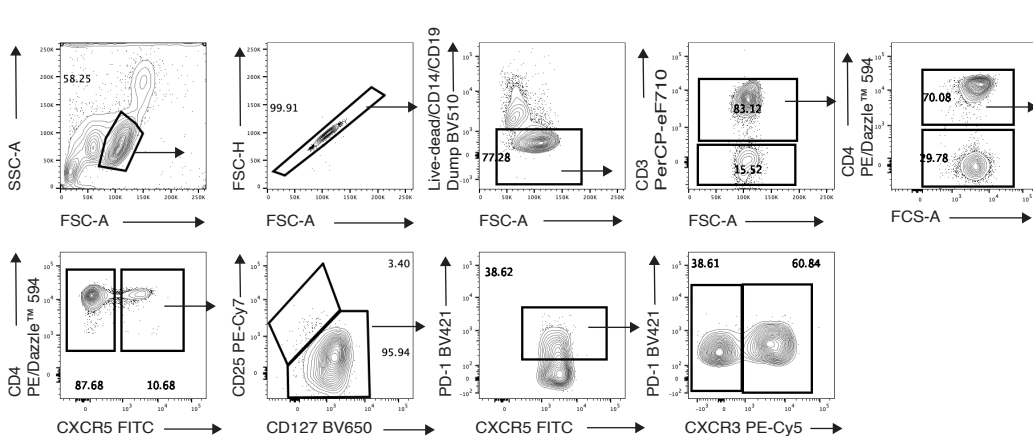

**Supplementary Table 1. Cohort Demographics and Clinical Characteristics**

|                                |                                                    | HIV+,<br>Lab confirmed<br>SARS-CoV-2<br>RT-PCR+ and/or<br>Ab Pos | HIV+<br>*Suspected<br>SARS-CoV-2                    | HIV-<br>Lab confirmed<br>SARS-CoV-2<br>RT-PCR+ and/or<br>Ab Pos | HIV-<br>*Suspected/<br>Household | HIV+<br>pre-<br>pandemic |
|--------------------------------|----------------------------------------------------|------------------------------------------------------------------|-----------------------------------------------------|-----------------------------------------------------------------|----------------------------------|--------------------------|
| <b>Group size</b>              | n                                                  | 24                                                               | 23                                                  | 31                                                              | 4                                | 16                       |
|                                | SARS-CoV-2 seropositive at date of sampling, n (%) | 23 (95.8)                                                        | 7 (30.43)                                           | 29 (93.5)                                                       | 0 (0.0)                          | 0 (0.0)                  |
| <b>COVID-19 severity**</b>     | Asymptomatic (score 1), n (%)                      | 2 (8.3)                                                          | 0 (0.0)                                             | 4 (12.9)                                                        | 1 (25.0)                         | -                        |
|                                | Non-hospitalized (score 2), n (%)                  | 14 (58.3)                                                        | 22 (95.7)                                           | 23 (74.2)                                                       | 3 (75.0)                         | -                        |
|                                | Hospitalized (score 4-5), n (%)                    | 8 (33.3)                                                         | 1 (4.3)                                             | 4 (12.9)                                                        | 0 (0.0)                          | -                        |
| <b>COVID-19 symptoms</b>       | Fever, n (%)                                       | 13 (54.2)                                                        | 18 (78.3)                                           | 16 (51.6)                                                       | 2 (50.0)                         | -                        |
|                                | Shortness of breath, n (%)                         | 14 (58.3)                                                        | 14 (60.9)                                           | 12 (38.7)                                                       | 1 (25.0)                         | -                        |
|                                | Fatigue, n (%)                                     | 21 (87.5)                                                        | 20 (87.0)                                           | 20 (64.5)                                                       | 4 (100.0)                        | -                        |
|                                | Cough, n (%)                                       | 17 (70.8)                                                        | 18 (78.3)                                           | 12 (38.7)                                                       | 3 (75.0)                         | -                        |
|                                | Headache, n (%)                                    | 10 (41.7)                                                        | 14 (60.9)                                           | 13 (41.9)                                                       | 2 (50.0)                         | -                        |
|                                | Altered taste/smell, n (%)                         | 13 (54.2)                                                        | 10 (43.5)                                           | 22 (71.0)                                                       | 2 (50.0)                         | -                        |
|                                | Duration of symptoms in days, median (range)       | 14 (2-48)                                                        | 21 (3-84)                                           | 10 (3-30)                                                       | 7 (5-7)                          | -                        |
|                                | Days post-symptom onset (DPSO), median (range)     | 148 (46-232)                                                     | 181 (126-273)                                       | 144 (101-220)                                                   | 200 (125-203)                    | -                        |
| <b>Risk factors</b>            | Age, median (range)                                | 51 (30-73)                                                       | 53 (30-67)                                          | 42 (26-65)                                                      | 35.5 (30-41)                     | 48 (30-60)               |
|                                | Sex, n female:male:other                           | 4:19:1                                                           | 2:21:0                                              | 16:15:0                                                         | 2:2:0                            | 2:14:0                   |
|                                | BMI, median (range)                                | 27.3 (20.2-33.8)                                                 | 24.6 (20.3-39.4)                                    | 25.7 (19.1-37.7)                                                | 21.9 (20.0-27.6)                 |                          |
| <b>Ethnicity</b>               | White, n (%)                                       | 16 (66.7)                                                        | 17 (73.9)                                           | 19 (61.3)                                                       | 1 (25.0)                         | 11 (68.8)                |
|                                | BAME, n (%)                                        | 8 (33.3)                                                         | 6 (26.1)                                            | 12 (38.7)                                                       | 3 (75.0)                         | 5 (31.3)                 |
| <b>Smoking</b>                 | Current, n (%)                                     | 3 (12.5)                                                         | 4 (17.4)                                            | 5 (16.1)                                                        | 0 (0.0)                          | 2 (12.5)                 |
|                                | Ex-smoker, n (%)                                   | 1 (4.2)                                                          | 1 (4.3)                                             | 2 (6.5)                                                         | 0 (0.0)                          | 1 (6.3)                  |
|                                | Non-smoker, n (%)                                  | 20 (83.3)                                                        | 18 (78.3)                                           | 24 (77.4)                                                       | 4 (100.0)                        | 13 (81.3)                |
| <b>HIV parameters</b>          | HIV viral load                                     | <50                                                              | <50                                                 | -                                                               | -                                | <50                      |
|                                | CD4, median (range)                                | 571 (133-1110)                                                   | 586 (310-1360)                                      | -                                                               | -                                | 590 (350-940)            |
|                                | CD4:CD8, median (range)                            | 0.84 (0.17-2.54)                                                 | 0.97 (0.37-2.15)                                    | -                                                               | -                                | 0.82 (0.43-2.26)         |
| <b>Pre-existing conditions</b> | None, n (%)                                        | 10 (41.7)                                                        | 8 (34.8)                                            | 15 (48.4)                                                       | 4 (100.0)                        | 11 (68.8)                |
|                                | Diabetes, n (%)                                    | 6 (25.0)                                                         | 1 (4.3)                                             | 1 (3.2)                                                         | 0 (0.0)                          | 1 (6.3)                  |
|                                | Hypertension/CVD, n (%)                            | 7 (29.2)                                                         | 2 (8.7)                                             | 3 (9.7)                                                         | 0 (0.0)                          | 2 (12.5)                 |
|                                | Renal disease, n (%)                               | 2 (8.3)                                                          | 2 (8.7)                                             | 0 (0.0)                                                         | 0 (0.0)                          | 0 (0)                    |
|                                | Respiratory disease (asthma and COPD), n (%)       | 2 (8.3)                                                          | 4 (17.4)                                            | 1 (3.2)                                                         | 0 (0.0)                          | 0 (0)                    |
|                                | Liver disease, n (%)                               | 1 (4.2)                                                          | 2 (8.7)                                             | 0 (0.0)                                                         | 0 (0.0)                          | 1 (6.3)                  |
|                                | Other                                              | ITP, psoriasis, pituitary gland failure                          | Osteoporosis, peripheral neuropathy, hypothyroidism | RA, iron deficiency, psoriasis, gout, SLE, hypothyroidism       |                                  |                          |

\*Confirmed, possible and probable cases specified by the case definition for COVID-19, as of 29 May 2020, European Centre for Disease Prevention and Control [<https://www.ecdc.europa.eu/en/covid-19/surveillance/case-definition>]

\*\*Severity of COVID-19 was classified according to the WHO (World Health Organisation) clinical progression scale (Aitken et al., 2020).



**Supplementary Table 2****Fluorochrome-Conjugated Antibodies:**

| Antibodies                                                        | Supplier  | Identifier   | Clone            | Dilution   |
|-------------------------------------------------------------------|-----------|--------------|------------------|------------|
| APC/Cyanine7 anti-human CD19 Antibody                             | BioLegend | Cat # 363010 | Clone # SJ25C1   | 1 in 100ul |
| APC/Cy7 anti-human CD197 (CCR7)                                   | BioLegend | Cat # 353212 | Clone # G043H7   | 1 in 50ul  |
| Brilliant Violet 605™ anti-human CD3 Antibody                     | BioLegend | Cat # 317322 | Clone # OKT3     | 1 in 100ul |
| Brilliant Violet 650™ anti-human CD127 (IL-7R $\alpha$ ) Antibody | BioLegend | Cat # 351325 | Clone # A019D5   | 1 in 100ul |
| Brilliant Violet 650™ anti-human CD3 Antibody                     | BioLegend | Cat # 317324 | Clone # OKT3     | 1 in 100ul |
| Brilliant Violet 711™ anti-human CD27 Antibody                    | BioLegend | Cat # 302833 | Clone # O323     | 1 in 100ul |
| Brilliant Violet 785™ anti-human CD38 Antibody                    | BioLegend | Cat # 303530 | Clone # HIT2     | 1 in 50ul  |
| Alexa Fluor® 700 anti-human CD45RA Antibody                       | BioLegend | Cat # 304120 | Clone # HI100    | 1 in 50ul  |
| PE/Cyanine7 anti-human CD45RA Antibody                            | BioLegend | Cat # 304126 | Clone # HI100    | 1 in 200ul |
| Brilliant Violet 421™ anti-human CD279 (PD-1) Antibody            | BioLegend | Cat # 329920 | Clone # EH12.2H7 | 1 in 100ul |
| PE/Dazzle™ 594 anti-human CD4 Antibody                            | BioLegend | Cat # 300548 | Clone # RPA-T4   | 1 in 100ul |
| PE anti-human IgD Antibody                                        | BioLegend | Cat # 348204 | Clone # IA6-2    | 1 in 200ul |
| APC anti-human IFN- $\gamma$ Antibody                             | BioLegend | Cat # 506510 | Clone # B27      | 1 in 100ul |
| Brilliant Violet 785™ anti-human CD8a Antibody                    | BioLegend | Cat # 301046 | Clone # RPA-T8   | 1 in 100ul |
| Brilliant Violet 711™ anti-human CD8a Antibody                    | BioLegend | Cat # 301044 | Clone # RPA-T8   | 1 in 100ul |
| Brilliant Violet 510™ anti-human CD4 Antibody                     | BioLegend | Cat # 300546 | Clone # RPA-T4   | 1 in 200ul |
| Brilliant Violet 510™ anti-human CD14 Antibody                    | BioLegend | Cat # 301842 | Clone # M5E2     | 1 in 200ul |

|                                                        |                |                  |                   |            |
|--------------------------------------------------------|----------------|------------------|-------------------|------------|
| Brilliant Violet 510™ anti-human CD19 Antibody         | BioLegend      | Cat # 302242     | Clone # H1B19     | 1 in 200ul |
| Brilliant Violet 711™ anti-human CD279 (PD-1) Antibody | BioLegend      | Cat # 329928     | Clone # EH12.2H7  | 1 in 50ul  |
| PE/Cyanine7 anti-human CD154 Antibody                  | BioLegend      | Cat # 310832     | Clone # 24-31     | 1 in 200ul |
| APC-R700 Mouse Anti-Human CD196 (CCR6)                 | BD Biosciences | Cat # 565173     | Clone # 11A9      | 1 in 25ul  |
| BB515 Rat Anti-Human CXCR5 (CD185)                     | BD Biosciences | Cat # 564624     | Clone # RF8B2     | 1 in 50ul  |
| BV605 Mouse Anti-Human CD56                            | BD Biosciences | Cat # 562780     | Clone # NCAM16.2  | 1 in 50ul  |
| PE-Cy7 Mouse Anti-Human CD25                           | BD Biosciences | Cat # 335824     | Clone # 2A3       | 1 in 50ul  |
| BB700 Mouse Anti-Human CD4                             | BD Biosciences | Cat # 566393     | Clone # SK3       | 1 in 200ul |
| PE-Cy™5 Mouse Anti-Human CD183                         | BD Biosciences | Cat # 551128     | Clone # 1C6/CXCR3 | 1 in 25ul  |
| PE-Cy™5 Mouse Anti-Human HLA-DR                        | BD Biosciences | Cat # 562007     | Clone # G46-6     | 1 in 200ul |
| FITC Mouse Anti-Human TNF-α                            | BD Biosciences | Cat # 554512     | Clone # MAb11     | 1 in 400ul |
| BV421 Mouse Anti-Human CD107A                          | BD Biosciences | Cat # 562623     | Clone # H4A3      | 1 in 200ul |
| Alexa Fluor® 700 Mouse anti-Human Granzyme B           | BD Biosciences | Cat # 560213     | Clone # GB11      | 1 in 100ul |
| PerCP-eFluor 710 Anti-Human IL-2                       | eBioscience    | Cat # 46-7029-42 | Clone # MQ1-17H12 | 1 in 50ul  |
| PerCP-eFluor 710 Anti-Human CD3                        | eBioscience    | Cat # 46-0037-42 | Clone # OKT3      | 1 in 100ul |
| PE Anti-Human TIGIT                                    | eBioscience    | Cat # 12-9500-42 | Clone # MBSA43    | 1 in 100ul |

### **Key Chemicals, Peptides, and Commercial Assays**

| Reagents                     | Supplier        | Identifier        |
|------------------------------|-----------------|-------------------|
| PepTivator SARS-CoV-2 Prot_N | Miltenyi Biotec | Cat # 130-126-698 |
| PepTivator SARS-CoV-2 Prot_M | Miltenyi Biotec | Cat # 130-126-702 |
| PepTivator CMV pp65, human   | Miltenyi Biotec | Cat # 130-093-438 |
| ProMix™ HIV Peptide Pool     | Proimmune       | Cat # PX-HIV      |
| Human IFN-γ ELISpot Kit      | Mabtech         | Cat # P3420-2A    |

|                                                            |          |                |                  |
|------------------------------------------------------------|----------|----------------|------------------|
| Human Cytomegalovirus ELISA Kit (CMV)                      | Anti-IgG | Abcam          | Cat # ab108724   |
| Brefeldin A                                                |          | eBioscience    | Cat # 00-4506-51 |
| GolgiStop (with Monensin)                                  |          | BD Biosciences | Cat # 554724     |
| Foxp3/TF Staining Buffer Set                               |          | Invitrogen     | Cat # 00-5523-00 |
| BD Cytfix/Cytoperm™ Fixation/Permeabilization Solution Kit |          | BD Biosciences | Cat # 554714     |
